# Supplementary material for: Pre-activated anti-viral innate immunity in the upper airways controls early SARS-CoV-2 infection in children
Source: bioRxiv or medRxiv preprint supplement (doi:10.1101/2021.06.24.21259087), 2021-06-28
Supplement: Supplementary file [file media-1.pdf]

# EDF1

**a**

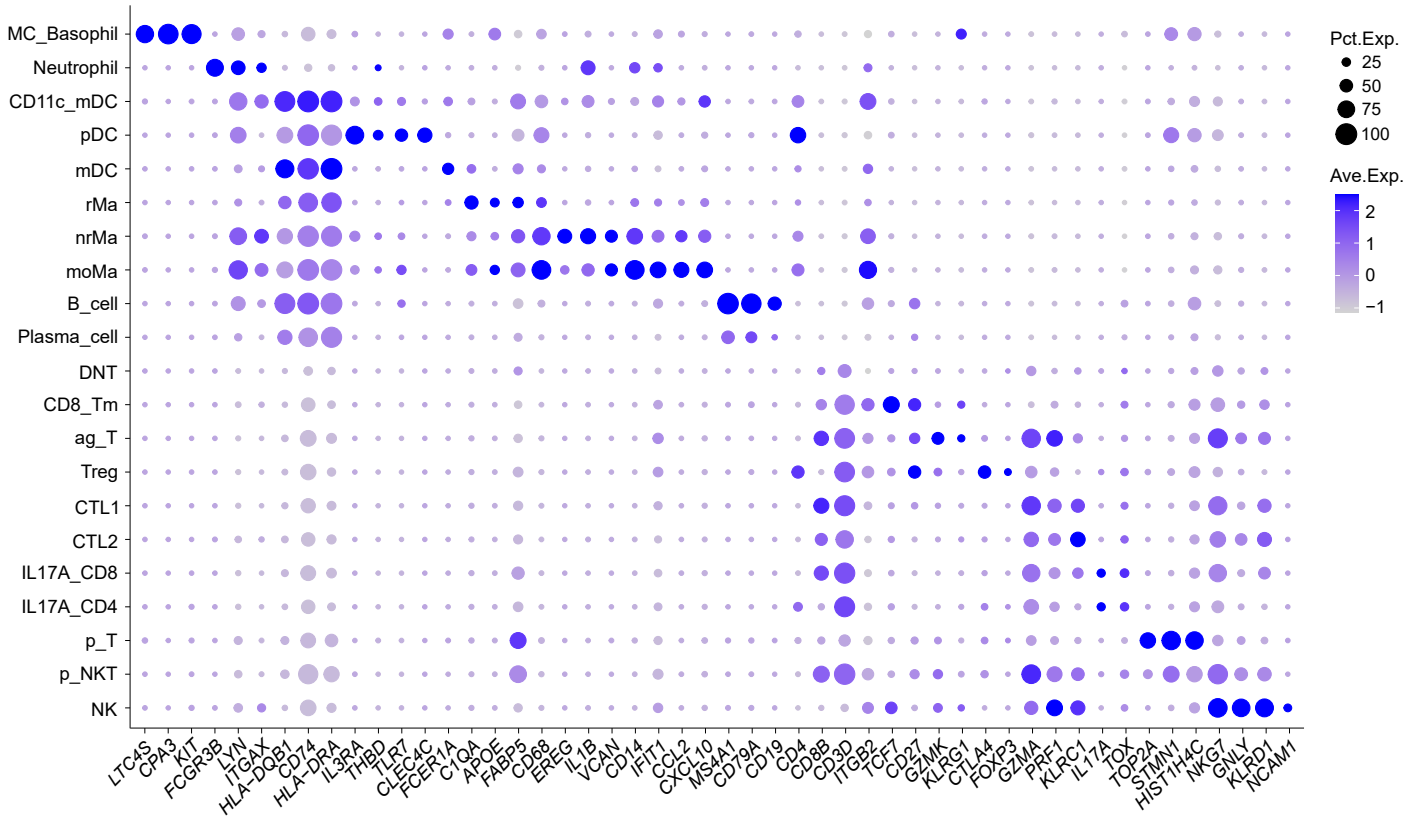

**b**

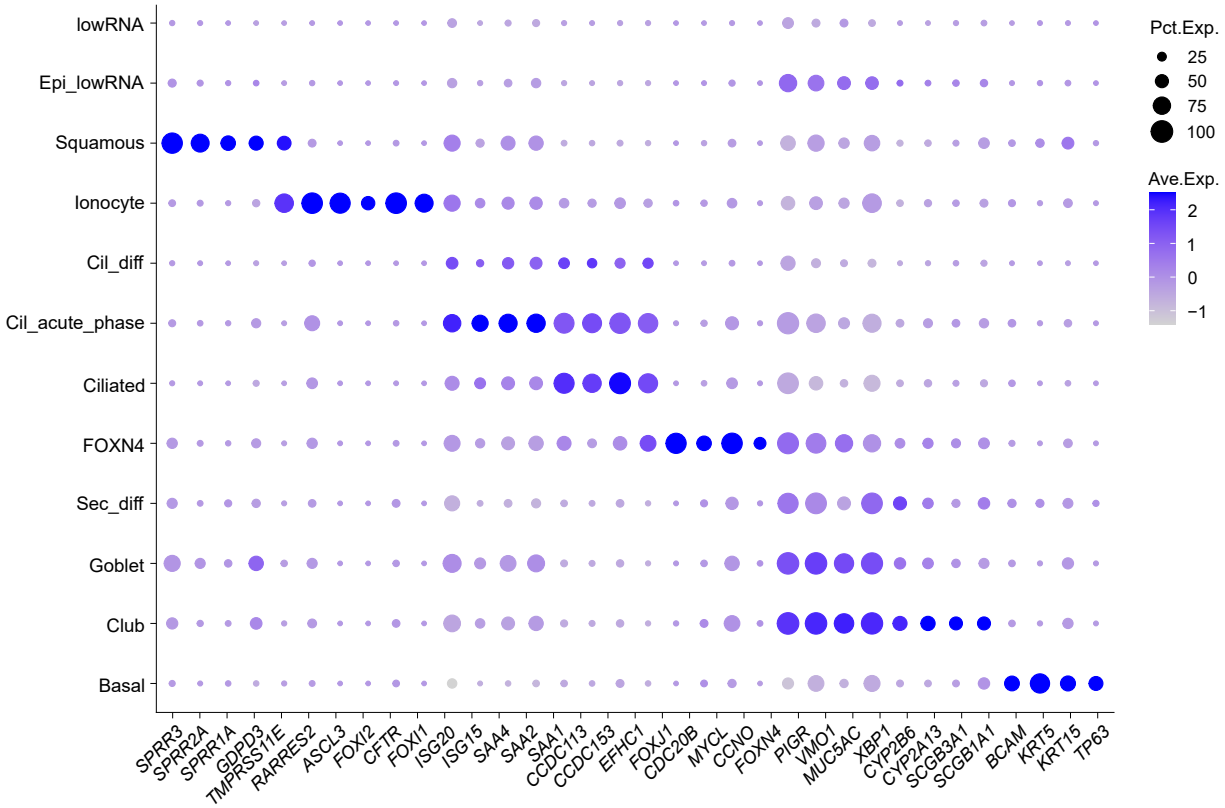

a

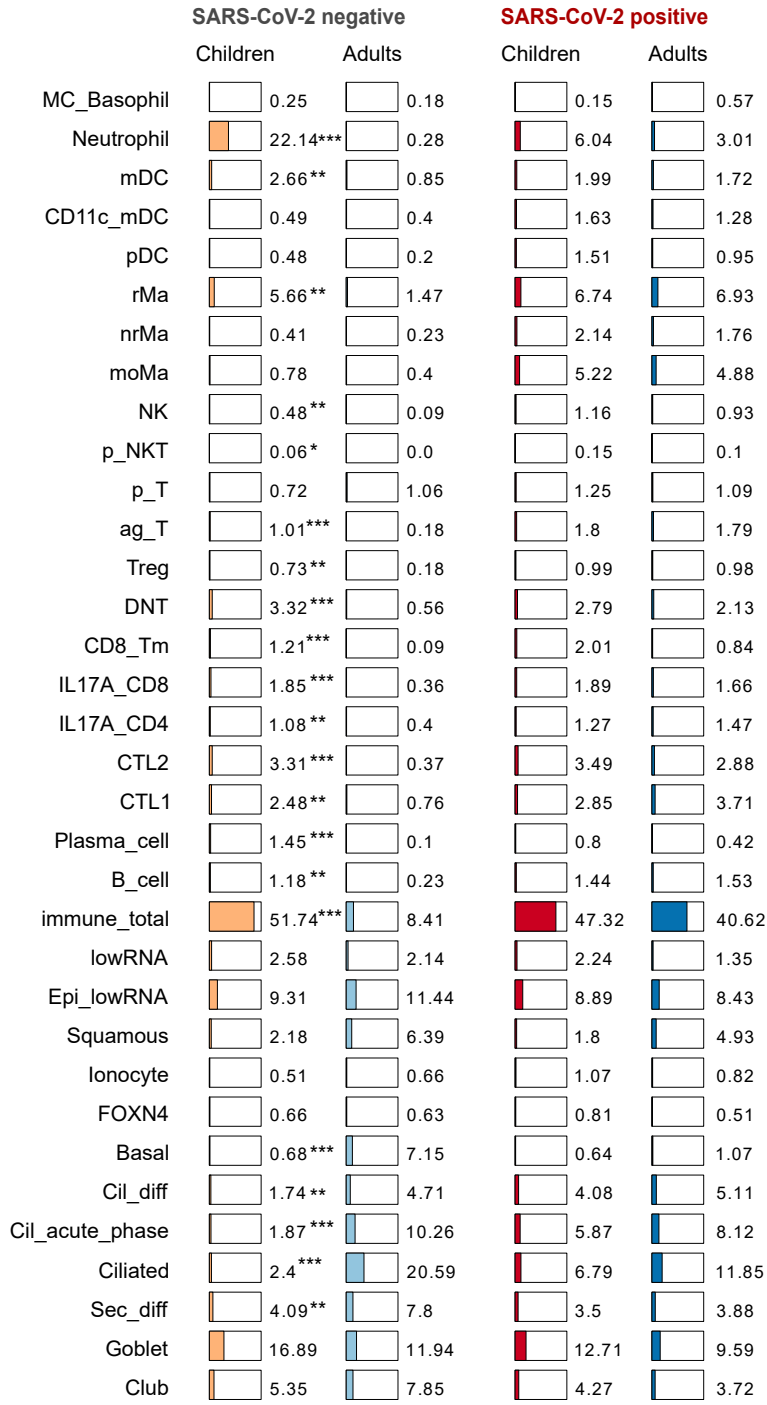

b

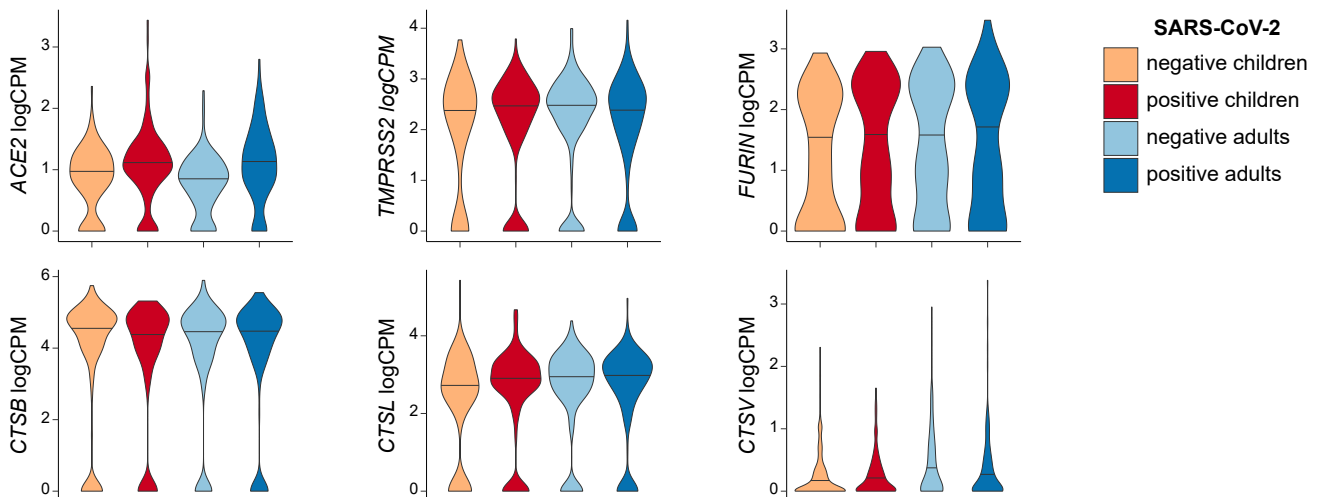

# EDF3

## all epithelial cells

## all ciliated cells

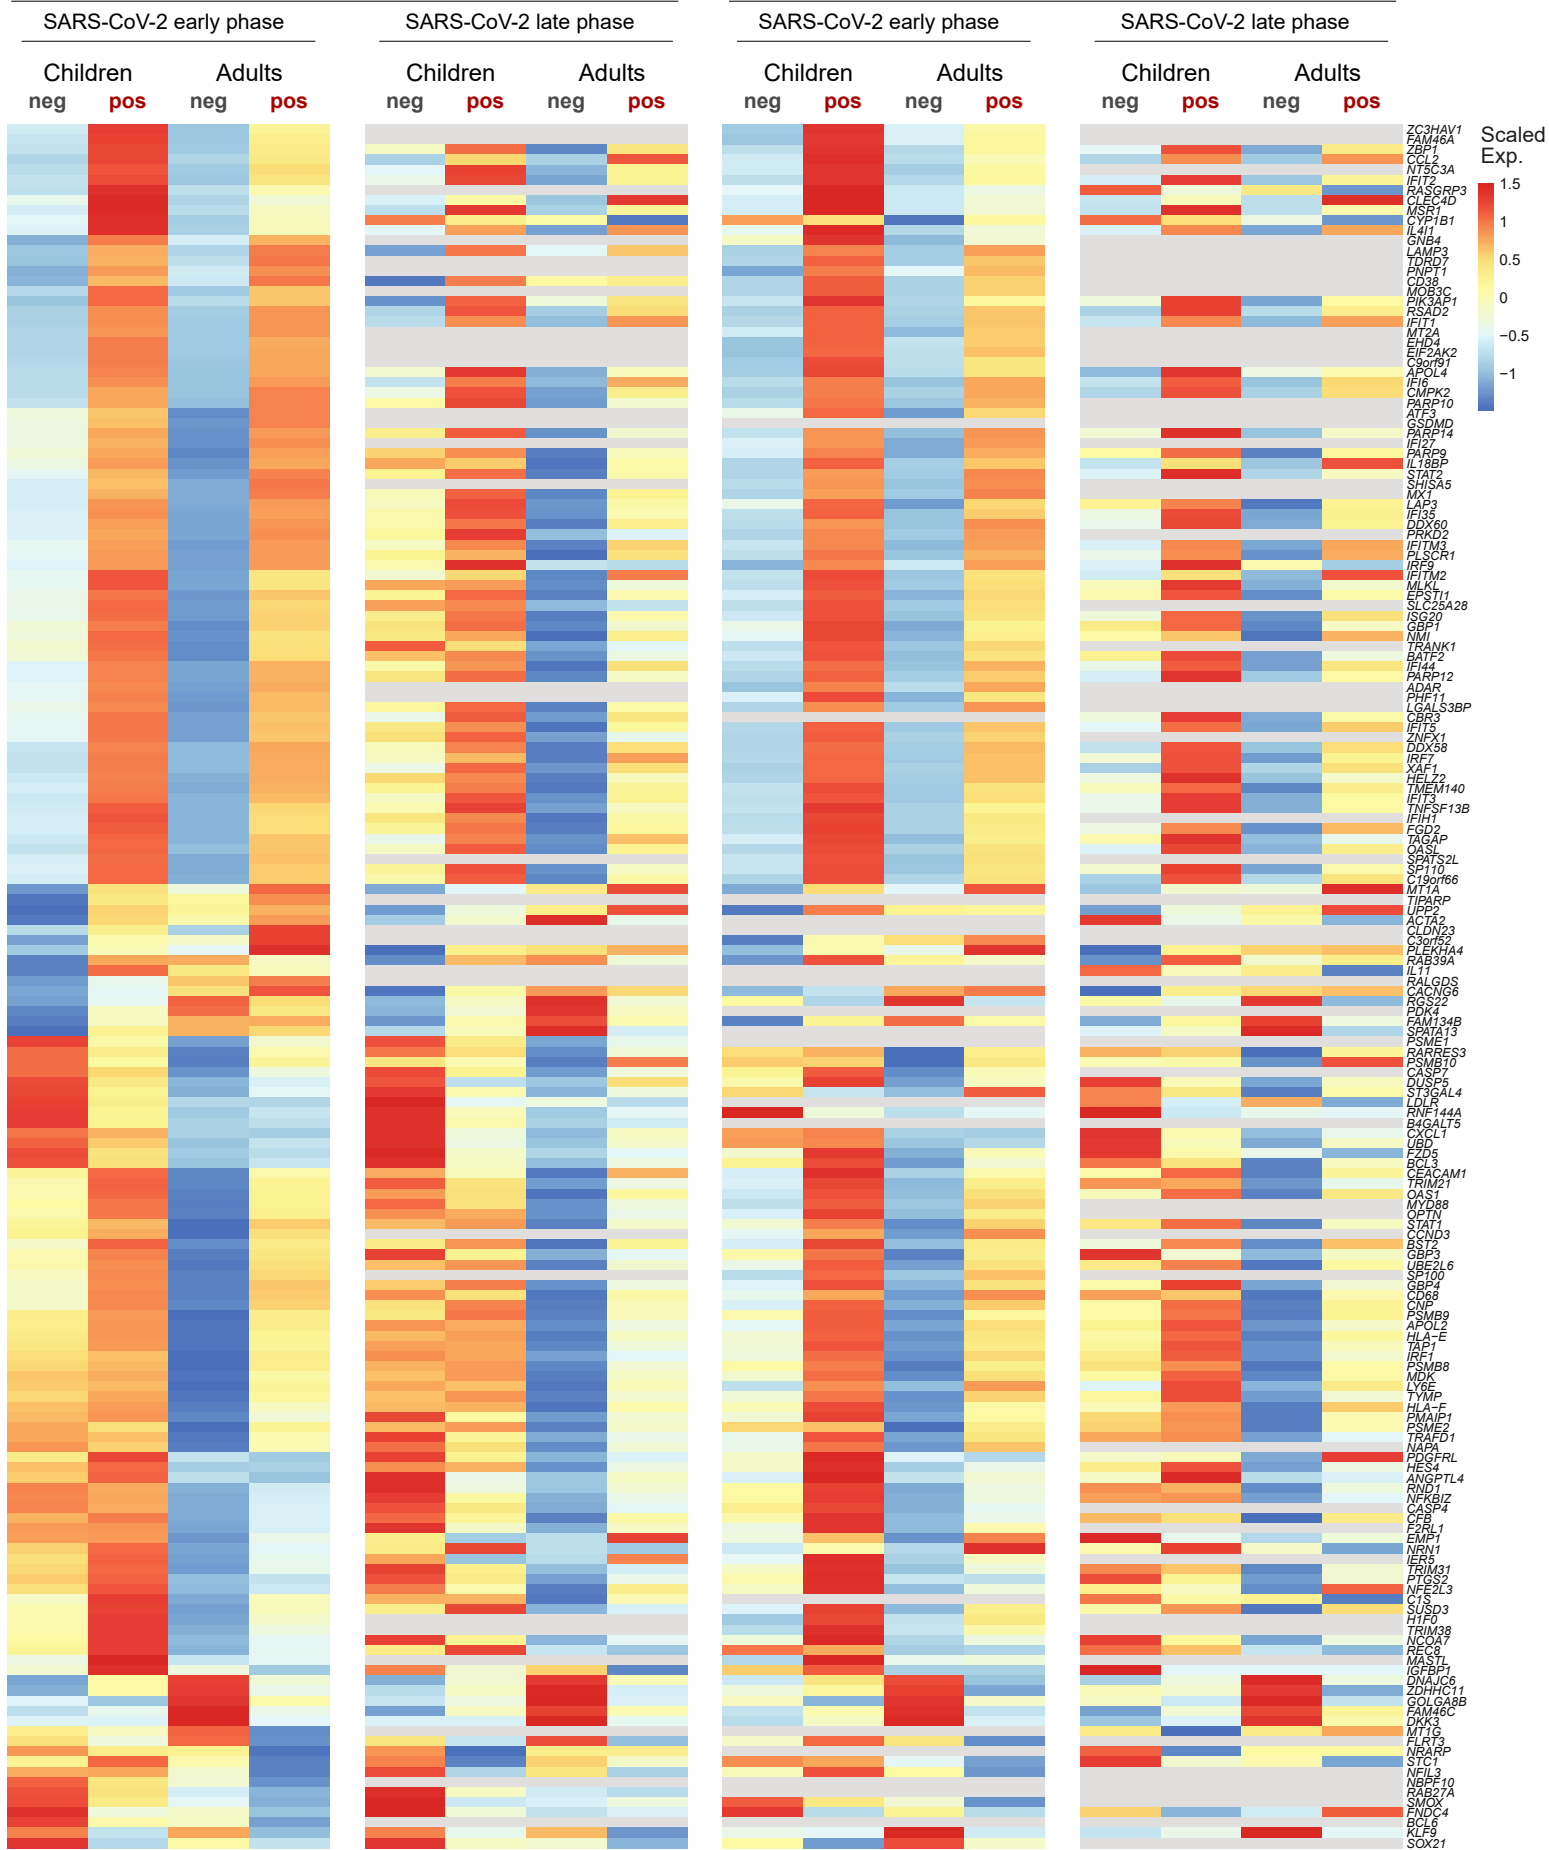



**Supplementary Table 1:** Characteristics of the **(a)** positive (n = 45) and **(b)** negative (n = 42) individuals included in the here present study.

**(a)**

| Patient-ID   | Gender | Age (years) | SARS-CoV-2 | WHO          | Sampling dps* | Sampling dpP# |
|--------------|--------|-------------|------------|--------------|---------------|---------------|
| BIH-c-CoV-01 | f      | < 1 year    | positive   | mild         | 8             | 0             |
| BIH-c-CoV-02 | m      | < 1 year    | positive   | mild         | 3             | 3             |
| BIH-c-CoV-03 | m      | 1-5         | positive   | asymptomatic | no symptoms   | 2             |
| BIH-c-CoV-04 | f      | 6-10        | positive   | mild         | 1             | 1             |
| BIH-c-CoV-05 | m      | 6-10        | positive   | mild         | 11            | 6             |
| BIH-c-CoV-06 | m      | 6-10        | positive   | mild         | 1             | 0             |
| BIH-c-CoV-07 | f      | 6-10        | positive   | moderate     | 7             | 0             |
| BIH-c-CoV-08 | m      | 6-10        | positive   | mild         | 4             | 1             |
| BIH-c-CoV-09 | m      | 6-10        | positive   | mild         | 6             | 0             |
| BIH-c-CoV-10 | f      | 11-15       | positive   | asymptomatic | no symptoms   | 0             |
| BIH-c-CoV-11 | m      | 11-15       | positive   | mild         | 2             | 0             |
| BIH-c-CoV-12 | m      | 11-15       | positive   | moderate     | 9             | 0             |
| BIH-c-CoV-13 | m      | 11-15       | positive   | mild         | 3             | 2             |
| BIH-c-CoV-14 | m      | 16-20       | positive   | moderate     | 2             | 2             |
| BIH-c-CoV-15 | f      | 16-20       | positive   | mild         | 5             | 4             |
| BIH-c-CoV-16 | f      | 16-20       | positive   | mild         | 3             | 0             |
| BIH-c-CoV-17 | m      | 1-5         | positive   | moderate     | 3             | 4             |
| BIH-c-CoV-18 | m      | 1-5         | positive   | moderate     | 0             | 4             |
| BIH-c-CoV-19 | f      | 1-5         | positive   | mild         | 6             | 3             |
| BIH-c-CoV-20 | f      | 6-10        | positive   | mild         | 6             | 6             |
| BIH-c-CoV-21 | m      | 6-10        | positive   | mild         | 5             | 0             |
| BIH-c-CoV-22 | f      | 6-10        | positive   | mild         | 5             | 0             |
| BIH-c-CoV-23 | f      | 11-15       | positive   | moderate     | 2             | 8             |
| BIH-c-CoV-24 | m      | 11-15       | positive   | moderate     | 6             | 7             |
| BIH-a-CoV-01 | f      | 26-30       | positive   | moderate     | 2             | 2             |
| BIH-a-CoV-02 | f      | 26-30       | positive   | mild         | 6             | 0             |
| BIH-a-CoV-03 | f      | 31-35       | positive   | mild         | 4             | 0             |
| BIH-a-CoV-04 | f      | 31-35       | positive   | mild         | 8             | 0             |
| BIH-a-CoV-05 | f      | 31-35       | positive   | moderate     | 5             | 3             |
| BIH-a-CoV-06 | m      | 31-35       | positive   | moderate     | 0             | 0             |
| BIH-a-CoV-07 | f      | 36-40       | positive   | moderate     | 12            | 0             |
| BIH-a-CoV-08 | f      | 41-45       | positive   | moderate     | 10            | 7             |
| BIH-a-CoV-09 | f      | 41-45       | positive   | moderate     | 4             | 6             |
| BIH-a-CoV-10 | m      | 41-45       | positive   | moderate     | 11            | 2             |
| BIH-a-CoV-11 | m      | 46-50       | positive   | moderate     | 11            | 0             |
| BIH-a-CoV-12 | f      | 46-50       | positive   | moderate     | 10            | 3             |
| BIH-a-CoV-13 | m      | 46-50       | positive   | mild         | 3             | 6             |
| BIH-a-CoV-14 | f      | 31-35       | positive   | mild         | 2             | 0             |
| BIH-a-CoV-15 | m      | 31-35       | positive   | mild         | 0             | 1             |
| BIH-a-CoV-16 | m      | 31-35       | positive   | mild         | 0             | 0             |
| BIH-a-CoV-17 | f      | 36-40       | positive   | mild         | 4             | 0             |
| BIH-a-CoV-18 | f      | 36-40       | positive   | mild         | 2             | 0             |
| BIH-a-CoV-19 | m      | 76-80       | positive   | moderate     | 3             | 1             |
| BIH-a-CoV-20 | m      | 46-50       | positive   | mild         | 4             | 0             |
| BIH-a-CoV-21 | m      | 41-45       | positive   | moderate     | 3             | 7             |

\*days post onset of symptoms; #days post first positive PCR

**Supplementary Table 1: Continued.****(b)**

| <b>Patient-ID</b> | <b>Gender</b> | <b>Age (years)</b> | <b>SARS-CoV-2</b> | <b>WHO</b> | <b>Sampling dps*</b> |
|-------------------|---------------|--------------------|-------------------|------------|----------------------|
| BIH-c-Con-01      | f             | 1-5                | negative          | negative   | no symptoms          |
| BIH-c-Con-02      | m             | 1-5                | negative          | negative   | no symptoms          |
| BIH-c-Con-03      | f             | 1-5                | negative          | negative   | no symptoms          |
| BIH-c-Con-04      | f             | 1-5                | negative          | negative   | no symptoms          |
| BIH-c-Con-05      | m             | 6-10               | negative          | negative   | no symptoms          |
| BIH-c-Con-06      | f             | 6-10               | negative          | negative   | no symptoms          |
| BIH-c-Con-07      | m             | 6-10               | negative          | negative   | no symptoms          |
| BIH-c-Con-08      | m             | 6-10               | negative          | negative   | no symptoms          |
| BIH-c-Con-09      | m             | 6-10               | negative          | negative   | no symptoms          |
| BIH-c-Con-10      | f             | 6-10               | negative          | negative   | no symptoms          |
| BIH-c-Con-11      | f             | 6-10               | negative          | negative   | no symptoms          |
| BIH-c-Con-12      | m             | 6-10               | negative          | negative   | no symptoms          |
| BIH-c-Con-13      | f             | 6-10               | negative          | negative   | no symptoms          |
| BIH-c-Con-14      | m             | 11-15              | negative          | negative   | no symptoms          |
| BIH-c-Con-15      | m             | 11-15              | negative          | negative   | no symptoms          |
| BIH-c-Con-16      | f             | 11-15              | negative          | negative   | no symptoms          |
| BIH-c-Con-17      | m             | 11-15              | negative          | negative   | no symptoms          |
| BIH-c-Con-18      | m             | 16-20              | negative          | negative   | no symptoms          |
| BIH-a-Con-01      | m             | 21-25              | negative          | negative   | no symptoms          |
| BIH-a-Con-02      | m             | 26-30              | negative          | negative   | no symptoms          |
| BIH-a-Con-03      | f             | 26-30              | negative          | negative   | no symptoms          |
| BIH-a-Con-04      | m             | 26-30              | negative          | negative   | no symptoms          |
| BIH-a-Con-05      | f             | 26-30              | negative          | negative   | no symptoms          |
| BIH-a-Con-06      | m             | 31-35              | negative          | negative   | no symptoms          |
| BIH-a-Con-07      | f             | 31-35              | negative          | negative   | no symptoms          |
| BIH-a-Con-08      | f             | 36-40              | negative          | negative   | no symptoms          |
| BIH-a-Con-09      | m             | 36-40              | negative          | negative   | no symptoms          |
| BIH-a-Con-10      | f             | 41-45              | negative          | negative   | no symptoms          |
| BIH-a-Con-11      | f             | 41-45              | negative          | negative   | no symptoms          |
| BIH-a-Con-12      | m             | 46-50              | negative          | negative   | no symptoms          |
| BIH-a-Con-13      | f             | 46-50              | negative          | negative   | no symptoms          |
| BIH-a-Con-14      | f             | 46-50              | negative          | negative   | no symptoms          |
| BIH-a-Con-15      | f             | 61-65              | negative          | negative   | no symptoms          |
| BIH-a-Con-16      | f             | 61-65              | negative          | negative   | no symptoms          |
| BIH-a-Con-17      | m             | 61-65              | negative          | negative   | no symptoms          |
| BIH-a-Con-18      | f             | 66-70              | negative          | negative   | no symptoms          |
| BIH-a-Con-19      | f             | 66-70              | negative          | negative   | no symptoms          |
| BIH-a-Con-20      | m             | 61-65              | negative          | negative   | no symptoms          |
| BIH-a-Con-21      | f             | 61-65              | negative          | negative   | no symptoms          |
| BIH-a-Con-22      | m             | 76-80              | negative          | negative   | no symptoms          |
| BIH-a-Con-23      | m             | 55-60              | negative          | negative   | no symptoms          |

\*days post onset of symptoms

**Supplementary Table 2:** Summary of cohort characteristics.

|                    | SARS-CoV-2 negative | SARS-CoV-2 positive |
|--------------------|---------------------|---------------------|
| <b>children</b>    |                     |                     |
| female             | 8                   | 10                  |
| male               | 10                  | 14                  |
| 0-6 years          | 4                   | 7                   |
| 7-10 years         | 9                   | 7                   |
| 11-18 years        | 5                   | 10                  |
| median age (years) | 9.0 ± 3.8           | 9.0 ± 5.6           |
| mean dps* (days)   | -                   | 4.5 ± 2.8           |
| mean dpP# (days)   | -                   | 2.2 ± 2.5           |
| <b>adults</b>      |                     |                     |
| female             | 13                  | 12                  |
| male               | 10                  | 9                   |
| median age (years) | 46.0 ± 16.3         | 39.0 ± 10.4         |
| mean dps* (days)   | -                   | 5.0 ± 3.7           |
| mean dpP# (days)   | -                   | 1.8 ± 2.5           |

\*days post onset of symptoms, #days post first positive PCR test
